# Supplementary material
Source: publisher figshare collection journal article supplement (https://frontiersin.figshare.com/ndownloader/files/17936051)
Supplement: Supplementary file [file 17936051]

## Supplementary Material

### 1 Supplementary Figures

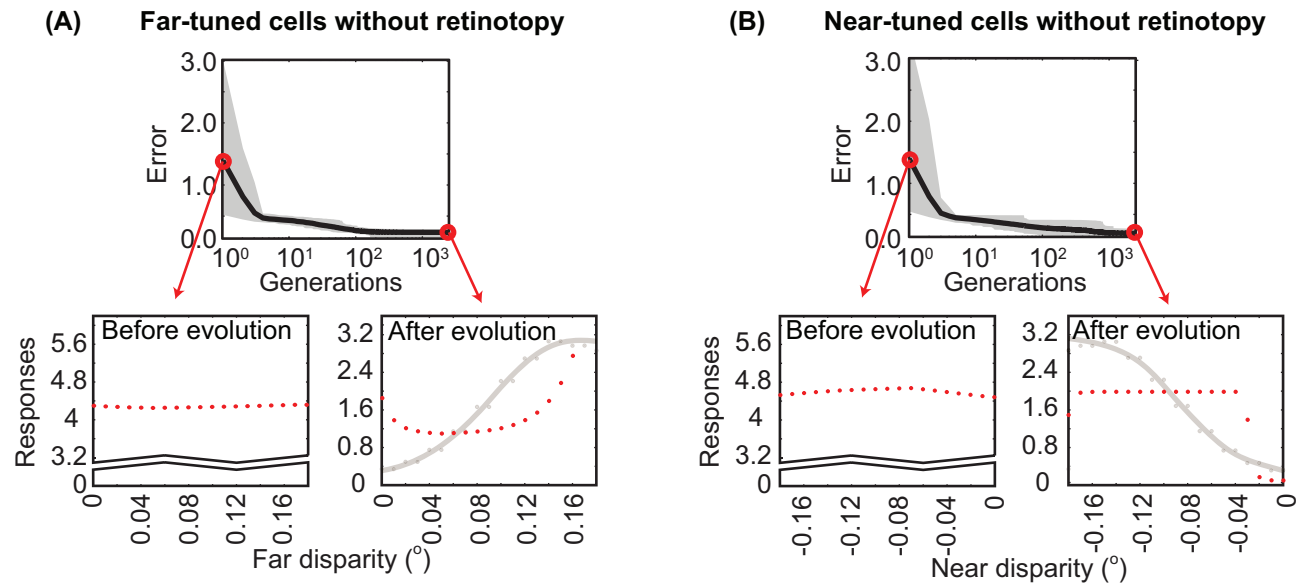

**Supplementary Figure 1. The importance of retinotopy.** (A) Average evolutionary profile of binocular neurons that received monocular inputs from the contrast boundaries of far objects placed at any eccentricity within  $2^\circ$  of the right visual hemi-field. Graphs below show the responses before and after 2,500 generations of evolution (red dots). Gray line indicates the average responses of networks that were retinotopically tuned to receive signals only from stimuli at  $0.3^\circ$  eccentricity (see Figure 3). (B) Average evolutionary profile and responses of binocular neurons that received monocular inputs from the contrast boundaries of near objects placed at any eccentricity within  $2^\circ$  of the right hemi-field. Thus networks not retinotopically tuned failed to evolve depth discrimination, even though depth signals from unequal binocular stimulation were present.

**(A) Monocular neurons****(A.I) Contralateral neuron**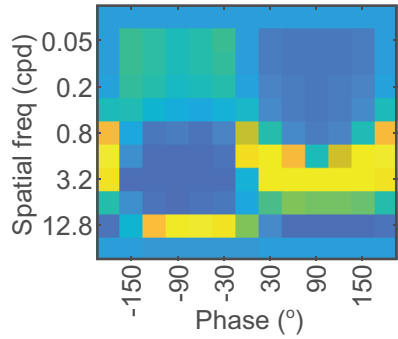**(A.II) Ipsilateral neuron**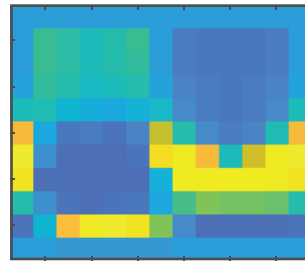**(B) Absolute disparity neurons****(B.I) Absolute far neuron**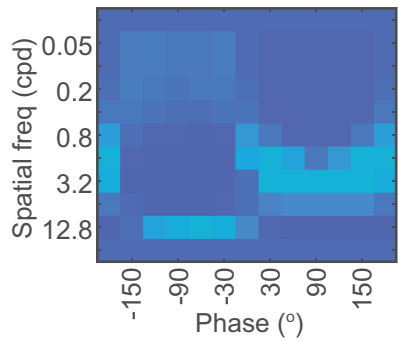**(B.II) Absolute near neuron**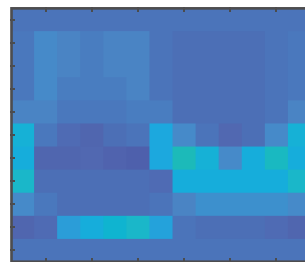**(C) Relative disparity neurons****(C.I) Relative far neuron**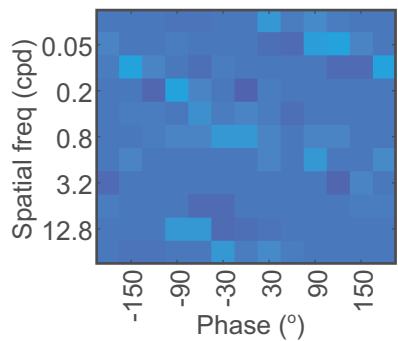**(C.II) Relative near neuron**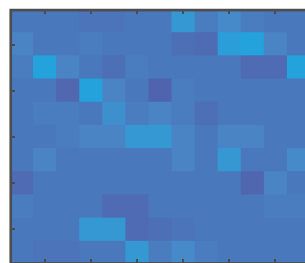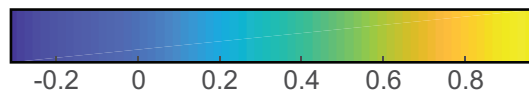

**Supplementary Figure 2. Responses to full field vertical sine wave gratings.** Phase was expressed relative to the position of the receptive fields of the target neurons; i.e., the 0° phase angle of a sine

wave grating is at  $0.3^\circ$  eccentric from the fixation point. Unlike relative disparity neurons, monocular and absolute disparity neurons show phase dependent responses. Labels correspond to neurons shown in Figure 6.
